# Supplementary material for: A multicentre retrospective cohort study of ovarian germ cell tumours: Evidence for chemotherapy de-escalation and alignment of paediatric and adult practice
Source: PubMed Central journal article supplement (PMC6522056; doi:10.1016/j.ejca.2019.03.001), 2019-05

**Suppl. Fig 3. Kaplan-Meier Event-Free Survival (EFS) according to residual disease**

No = no macroscopically visible residual disease, Yes = any macroscopically visible residual disease at completion of surgery

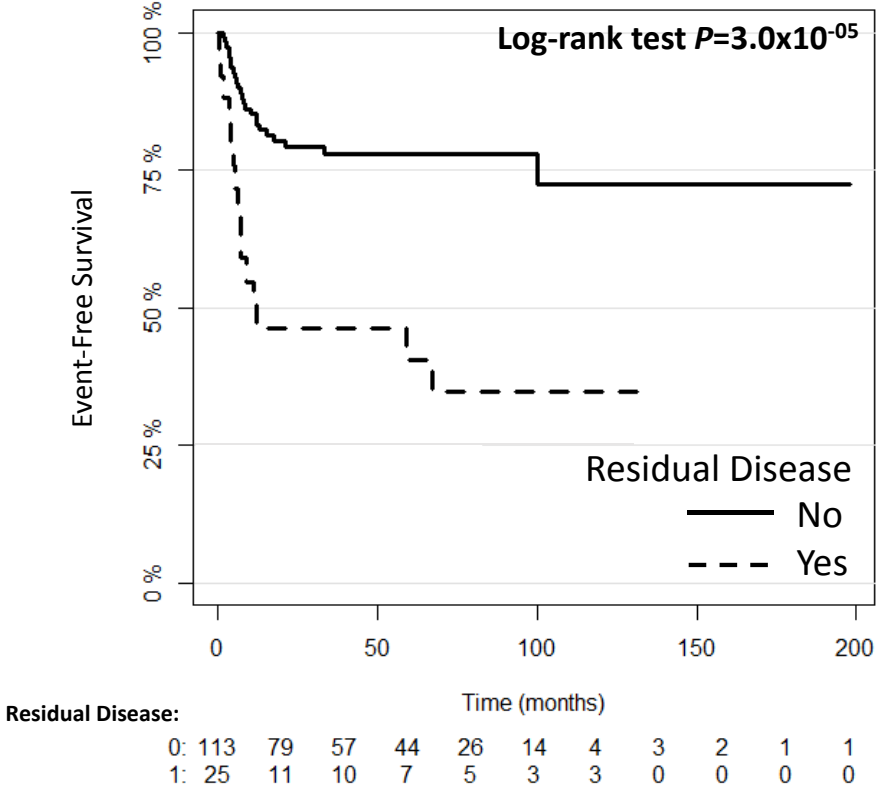

Supplement: mmc1.pdf [file mmc1.pdf]
