# Supplementary material for: A multicentre retrospective cohort study of ovarian germ cell tumours: Evidence for chemotherapy de-escalation and alignment of paediatric and adult practice
Source: PubMed Central journal article supplement (PMC6522056; doi:10.1016/j.ejca.2019.03.001), 2019-05

Suppl. Fig 1. Number of patients receiving neo-adjuvant and adjuvant chemotherapy according to FIGO stage

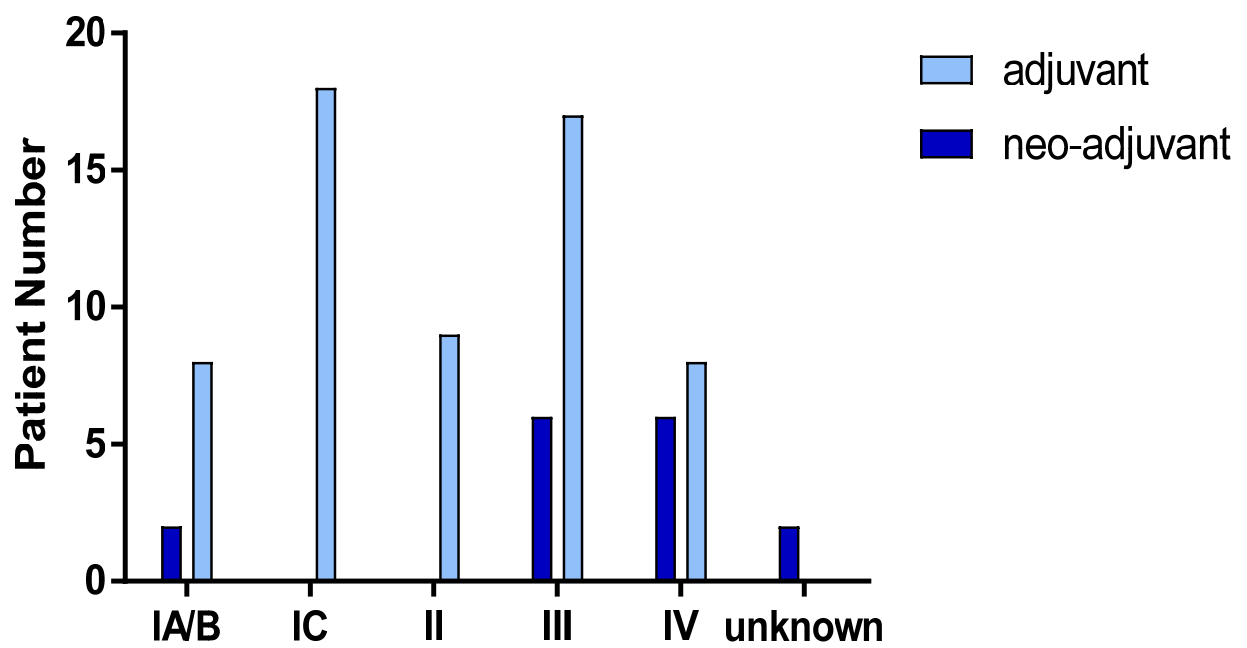

Supplement: mmc2.pdf [file mmc2.pdf]
