# Supplementary material for: A multicentre retrospective cohort study of ovarian germ cell tumours: Evidence for chemotherapy de-escalation and alignment of paediatric and adult practice
Source: PubMed Central journal article supplement (PMC6522056; doi:10.1016/j.ejca.2019.03.001), 2019-05

Suppl. Fig 2. Number of patients receiving first-line chemotherapy by FIGO stage and histology

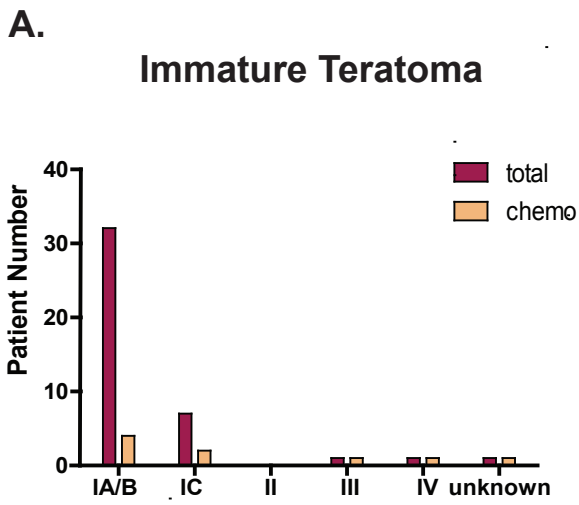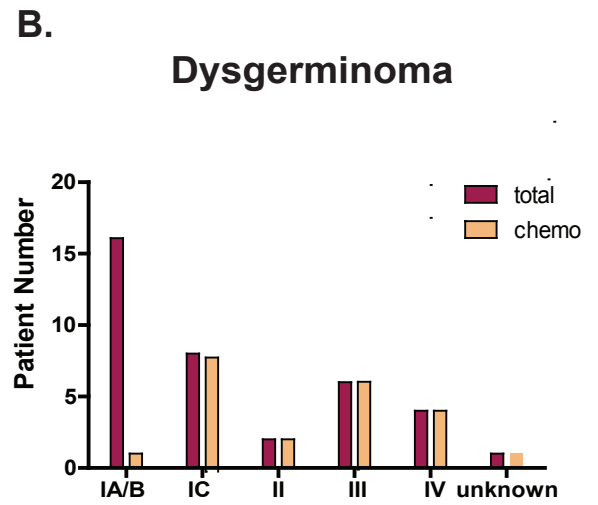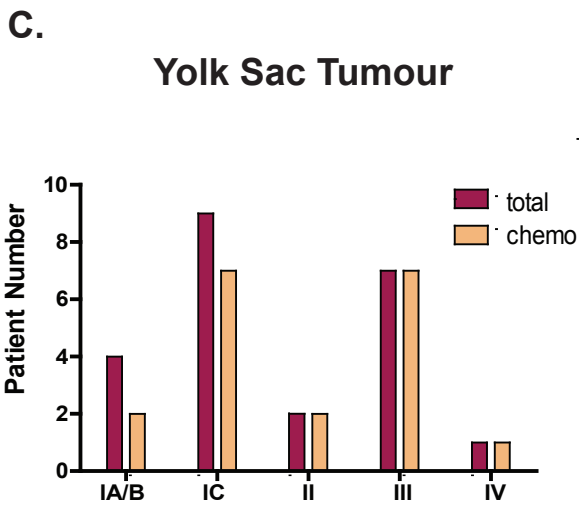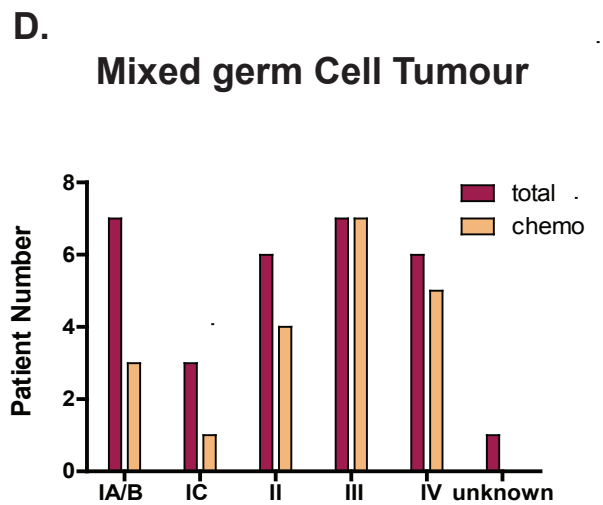

Supplement: mmc3.pdf [file mmc3.pdf]
